# Supplementary material for: ATP13A2 modifies mitochondrial localization of overexpressed TOM20 to autolysosomal pathway
Source: PubMed Central journal article supplement (PMC9707766; doi:10.1371/journal.pone.0276823), 2022-11-29
Supplement: pone.0276823.s001.pdf [file pone.0276823.s001.pdf]

# Supplementary Data

Mito Grx1-roGFP2    ATP13A2-Halo    Merge

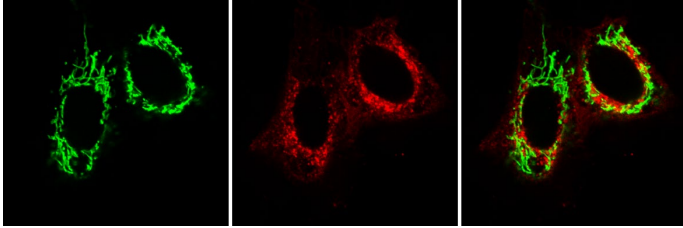

PMP2-Grx1-roGFP2    ATP13A2-Halo    Merge

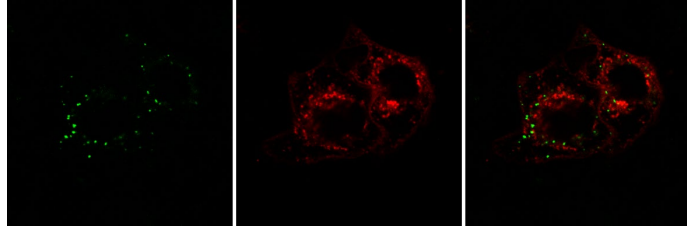

LifeAct7-Grx1-roGFP2    ATP13A2-Halo    Merge

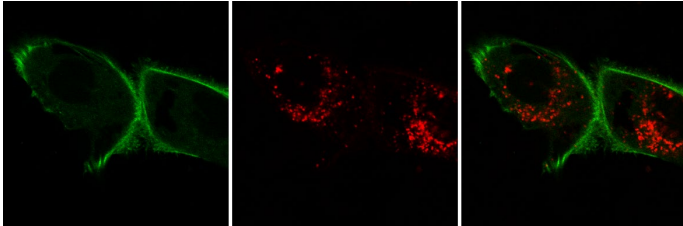

EGFP-LC3    ATP13A2-Halo    Merge

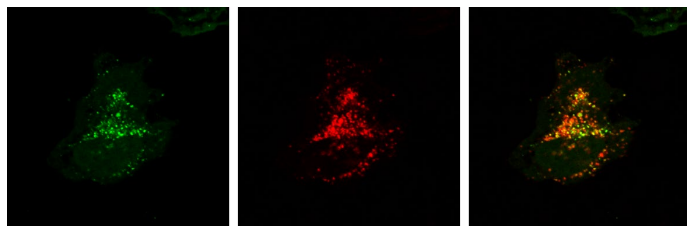

Keratin-Grx1-roGFP2    ATP13A2-Halo    Merge

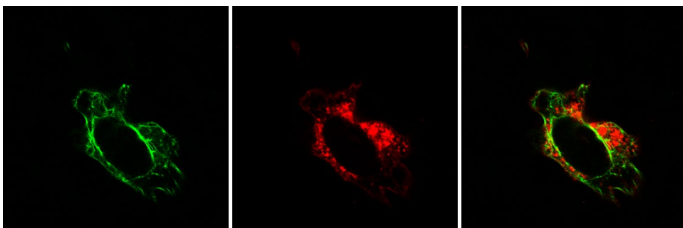

ATP13A2-Halo    Lamp1-RFP    Merge

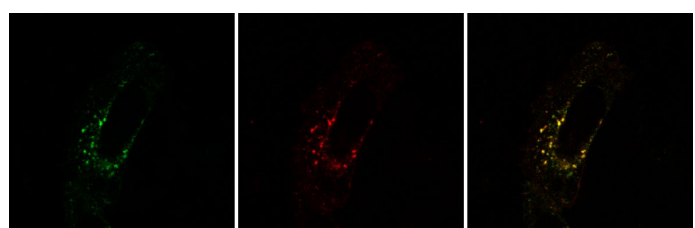

Sec-61b-Grx1-roGFP2    ATP13A2-Halo    Merge

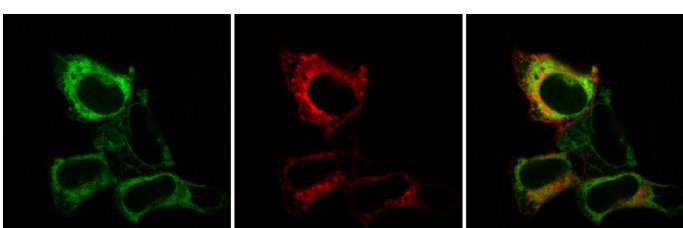

**S1 Fig.** Full documentation of the immunostaining data (ATP13A2-Halo). Only representative images are shown in the main figure 2.
