# Supplementary material for: ATP13A2 modifies mitochondrial localization of overexpressed TOM20 to autolysosomal pathway
Source: PubMed Central journal article supplement (PMC9707766; doi:10.1371/journal.pone.0276823), 2022-11-29
Supplement: pone.0276823.s002.pdf [file pone.0276823.s002.pdf]

**A**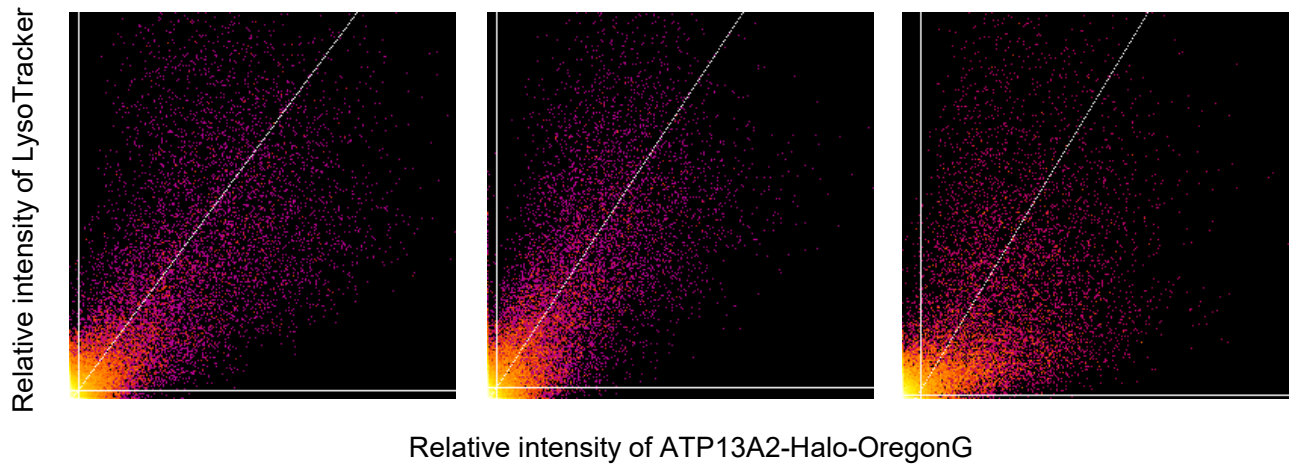**B**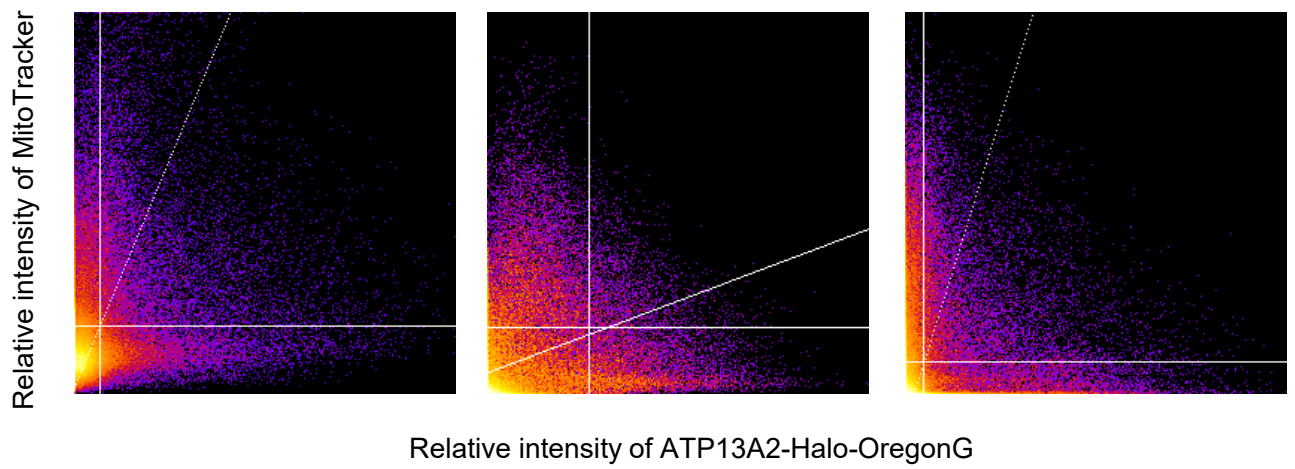

**S2 Fig. Scatter plots of the images used in the main figures 2A and B.** Representative 3 plots for each experimental condition are shown. A, ATP13A2-Halo-OregonG vs LysoTracker. B, ATP13A2-Halo-OregonG vs MitoTracker.
