# Supplementary material for: ATP13A2 modifies mitochondrial localization of overexpressed TOM20 to autolysosomal pathway
Source: PubMed Central journal article supplement (PMC9707766; doi:10.1371/journal.pone.0276823), 2022-11-29
Supplement: pone.0276823.s003.pdf [file pone.0276823.s003.pdf]

**A**

— ATP13A2-Halo

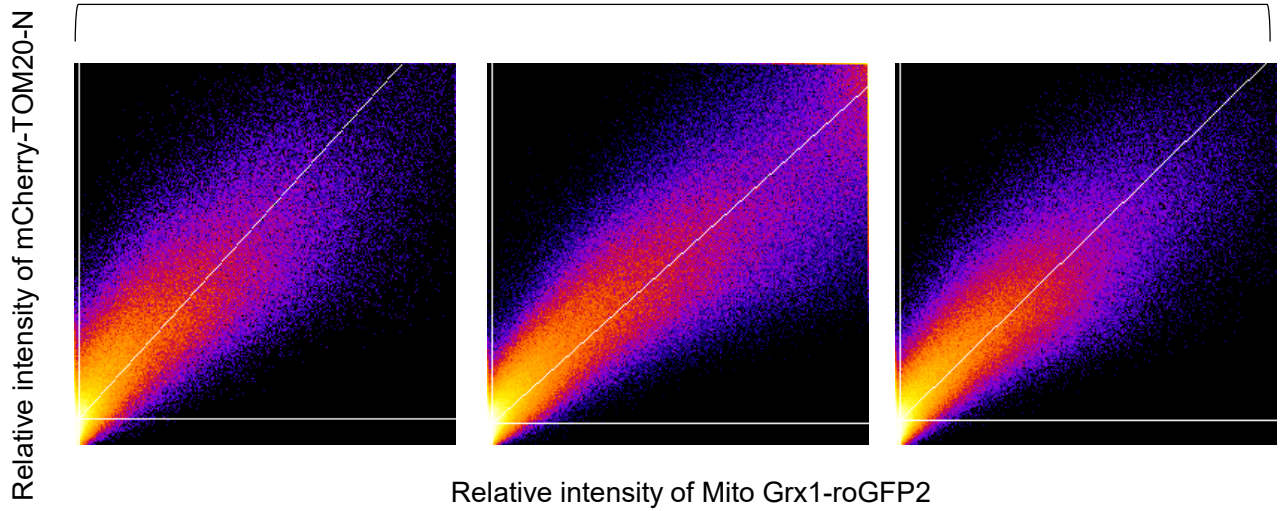**B**

+ ATP13A2-Halo

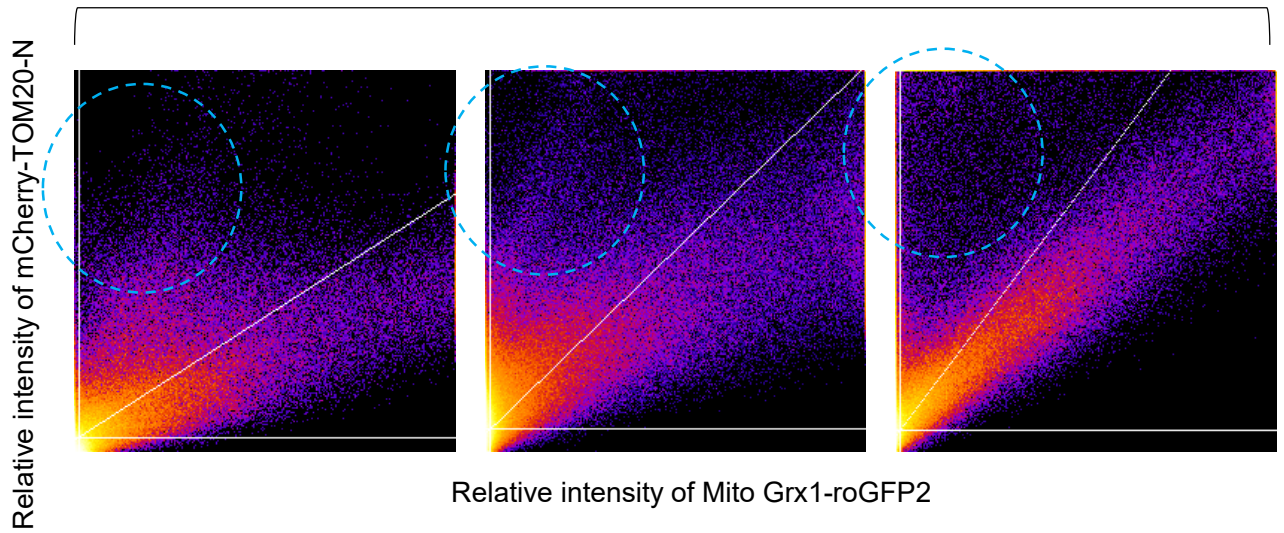

**S3 Fig. Scatter plots (Mito Grx1-roGFP2 vs mCherry-Tom20-N) of the images used in the main figure 3B and 3C.** Representative 3 plots for each experimental condition are shown. Cells were co-transfected with ATP13A2-Halo (B), resulting in partial segregation of Tom20 signals from Mito Grx1-roGFP2 signals (dashed circles). Without ATP13A2 co-transfection (A), Mito Grx1-roGFP2 and mCherry-Tom20-N signals produced practically perfect overlap.
