# Supplementary material for: ATP13A2 modifies mitochondrial localization of overexpressed TOM20 to autolysosomal pathway
Source: PubMed Central journal article supplement (PMC9707766; doi:10.1371/journal.pone.0276823), 2022-11-29
Supplement: pone.0276823.s004.pdf [file pone.0276823.s004.pdf]

**A**

Relative intensity of ATP13A2-Halo-TMR

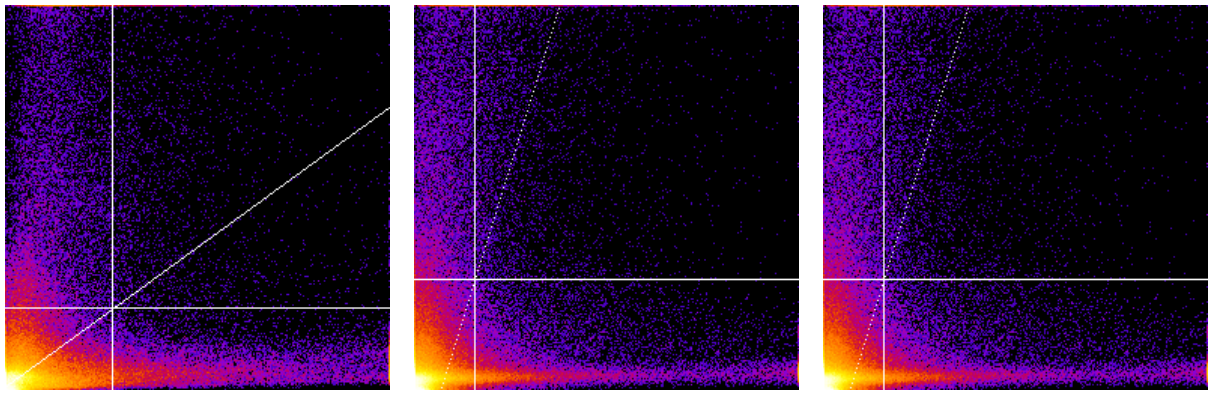

Relative intensity of Mito Grx1-roGFP2

**B**

Relative intensity of mCherry-TOM20-N

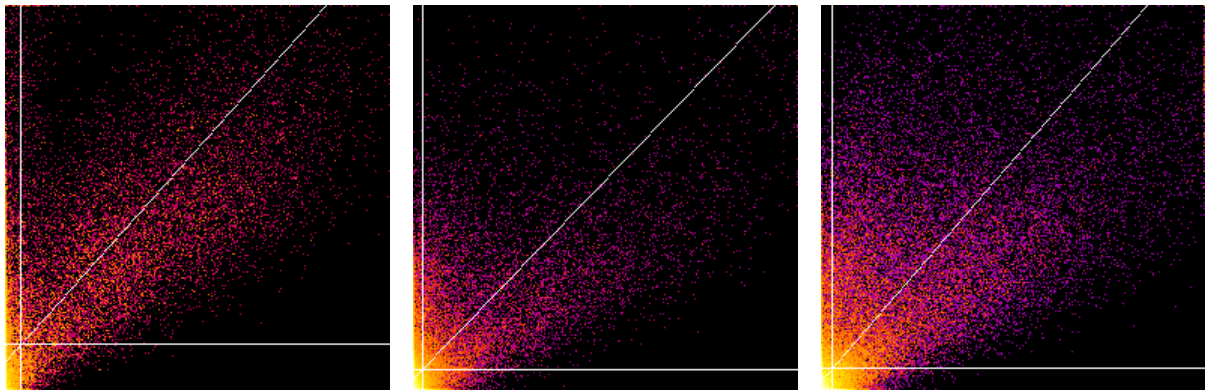

Relative intensity of ATP13A2-Halo-OregonG

**C**

Relative intensity of mCherry-TOM20-N

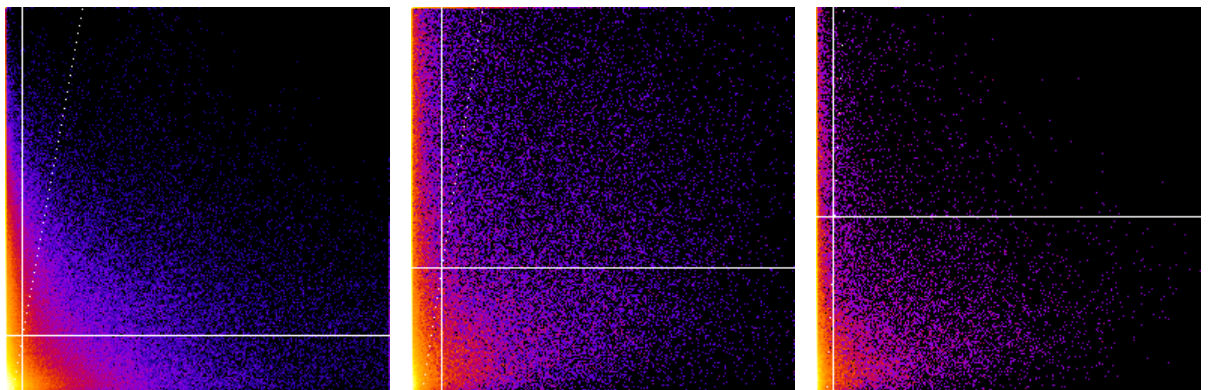

Relative intensity of ATP13A2(D513A)-Halo-OregonG

**S4 Fig. Scatter plots of the images used in the main figure 3D and 3E.** Representative 3 plots for each experimental condition are shown. A, Mito Grx1-roGFP2 vs ATP13A2-Halo-TMR. B, ATP13A2-Halo-OregonG vs mCherry-Tom20-N. C, ATP13A2(D513A)-Halo-OregonG vs mCherry-Tom20-N.
