# Supplementary material for: ATP13A2 modifies mitochondrial localization of overexpressed TOM20 to autolysosomal pathway
Source: PubMed Central journal article supplement (PMC9707766; doi:10.1371/journal.pone.0276823), 2022-11-29
Supplement: pone.0276823.s005.pdf [file pone.0276823.s005.pdf]

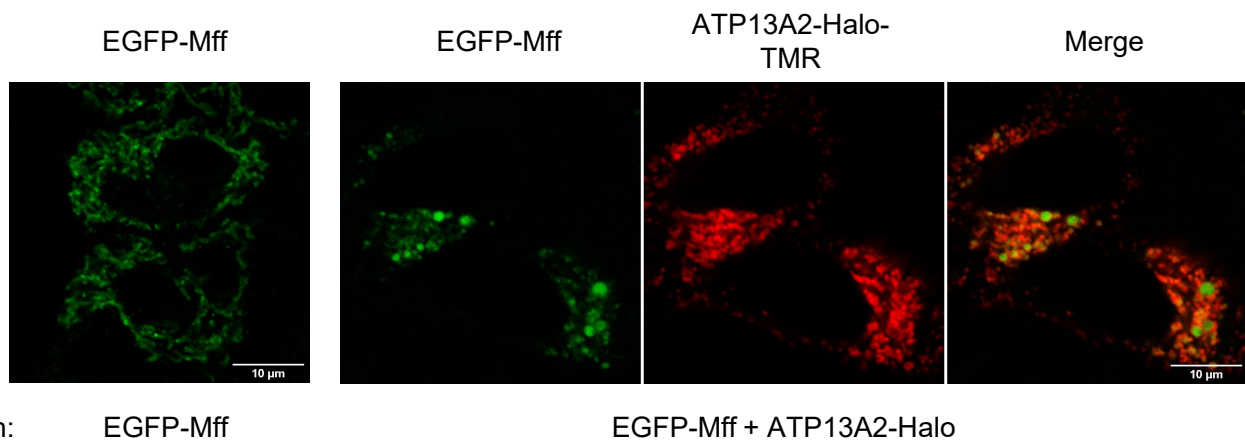

**S5 Fig. ATP13A2 overexpression altered the intracellular distribution of GFP-Mff (mitochondrial outermembrane) in HeLa cells.** GFP-Mff and ATP13A2-Halo were cotransfected and ATP13A2-Halo was labeled by TMR ligand, followed by live-cell imaging.
