# Supplementary material for: ATP13A2 modifies mitochondrial localization of overexpressed TOM20 to autolysosomal pathway
Source: PubMed Central journal article supplement (PMC9707766; doi:10.1371/journal.pone.0276823), 2022-11-29
Supplement: pone.0276823.s006.pdf [file pone.0276823.s006.pdf]

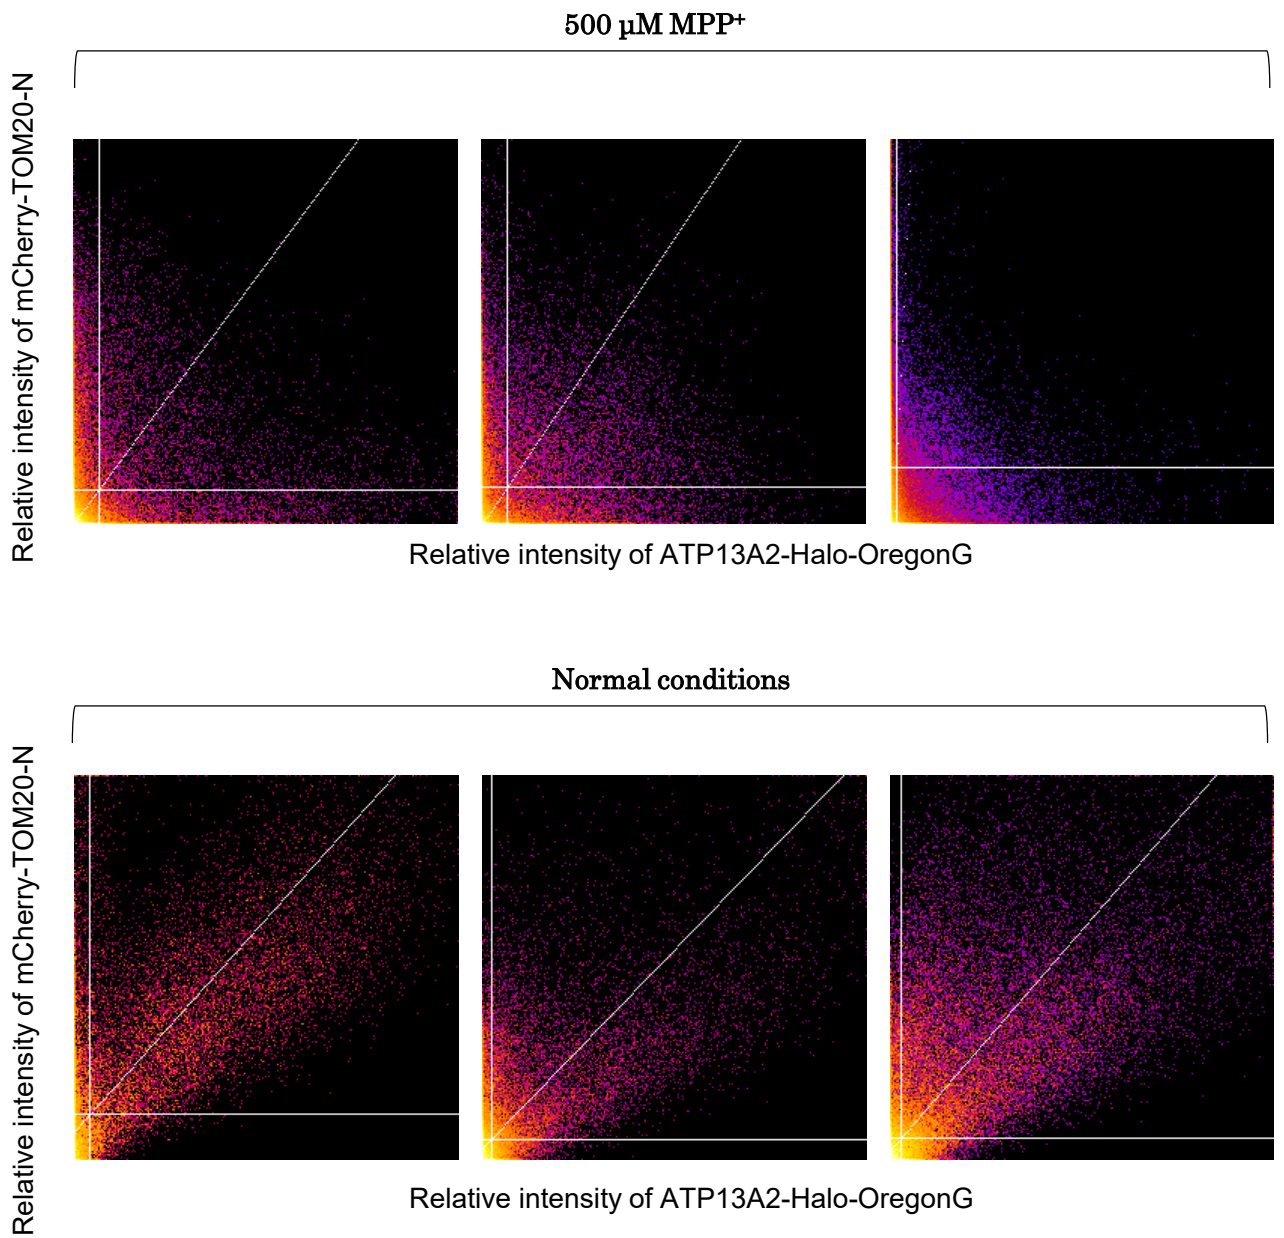

**S6 Fig. Scatter plots of the images used in the main figure 4A and B.** Representative 3 plots for each experimental condition are shown. Cells were incubated in the presence of 500  $\mu$ M MPP<sup>+</sup> for 24 hours (upper panel). For comparison, data for normal conditions (the same as the plots shown in supplementary figure 4B) are shown (lower panel)
