# Supplementary material for: ATP13A2 modifies mitochondrial localization of overexpressed TOM20 to autolysosomal pathway
Source: PubMed Central journal article supplement (PMC9707766; doi:10.1371/journal.pone.0276823), 2022-11-29
Supplement: pone.0276823.s007.pdf [file pone.0276823.s007.pdf]

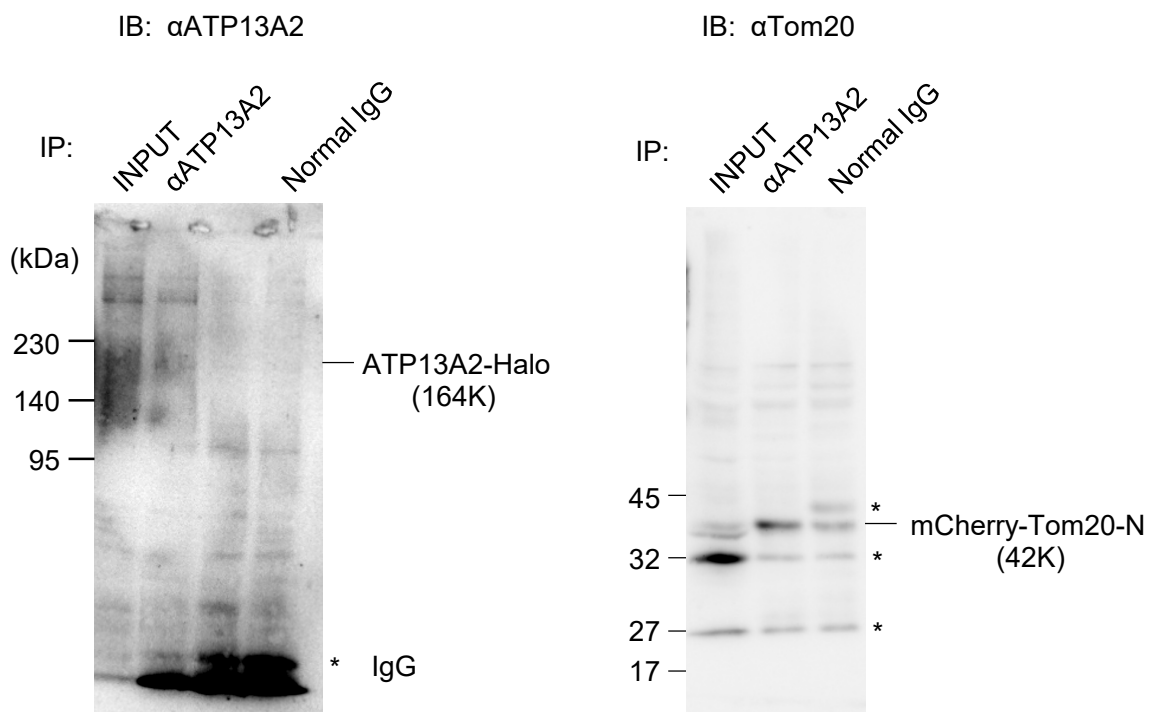

**S7 Fig. Original images of the membranes shown in the main figure 6. Nonspecific bands are marked with asterisks.**
